# Supplementary material for: Effects of the Antidepressant Amitriptyline on Juvenile Brown Trout and Their Modulation by Microplastics
Source: MDPI journal article supplement (doi:10.3390/toxics10120763), 2022-12-07
Supplement: s1 [file s1]

## Supplementary Materials

**Table S1.** Size ranges (in  $\mu\text{m}$ ) and counted particle numbers (per mL) of polystyrene particles in an exemplarily measured stock suspension.

| Size range ( $\mu\text{m}$ ) | Particle number (1/mL) |
|------------------------------|------------------------|
| 2-3                          | 9067                   |
| 3-4                          | 6488                   |
| 4-5                          | 8872                   |
| 5-6                          | 4832                   |
| 6-7                          | 3770                   |
| 7-8                          | 3484                   |
| 8-9                          | 3076                   |
| 9-10                         | 2412                   |
| 10-12                        | 3259                   |
| 12-14                        | 2330                   |
| 14-16                        | 1628                   |
| 16-18                        | 1195                   |
| 18-20                        | 1081                   |
| 20-25                        | 1698                   |
| 25-30                        | 1041                   |
| 30-35                        | 643                    |
| 35-40                        | 473                    |
| 40-50                        | 511                    |
| 50-60                        | 220                    |
| 60-70                        | 89                     |
| 70-80                        | 43                     |
| 80-90                        | 18                     |
| 90-100                       | 6                      |
| 100-150                      | 5                      |
| 150-200                      | 0                      |
| 200-250                      | 0                      |
| 250-300                      | 0                      |
| 300-350                      | 0                      |
| 350-400                      | 0                      |

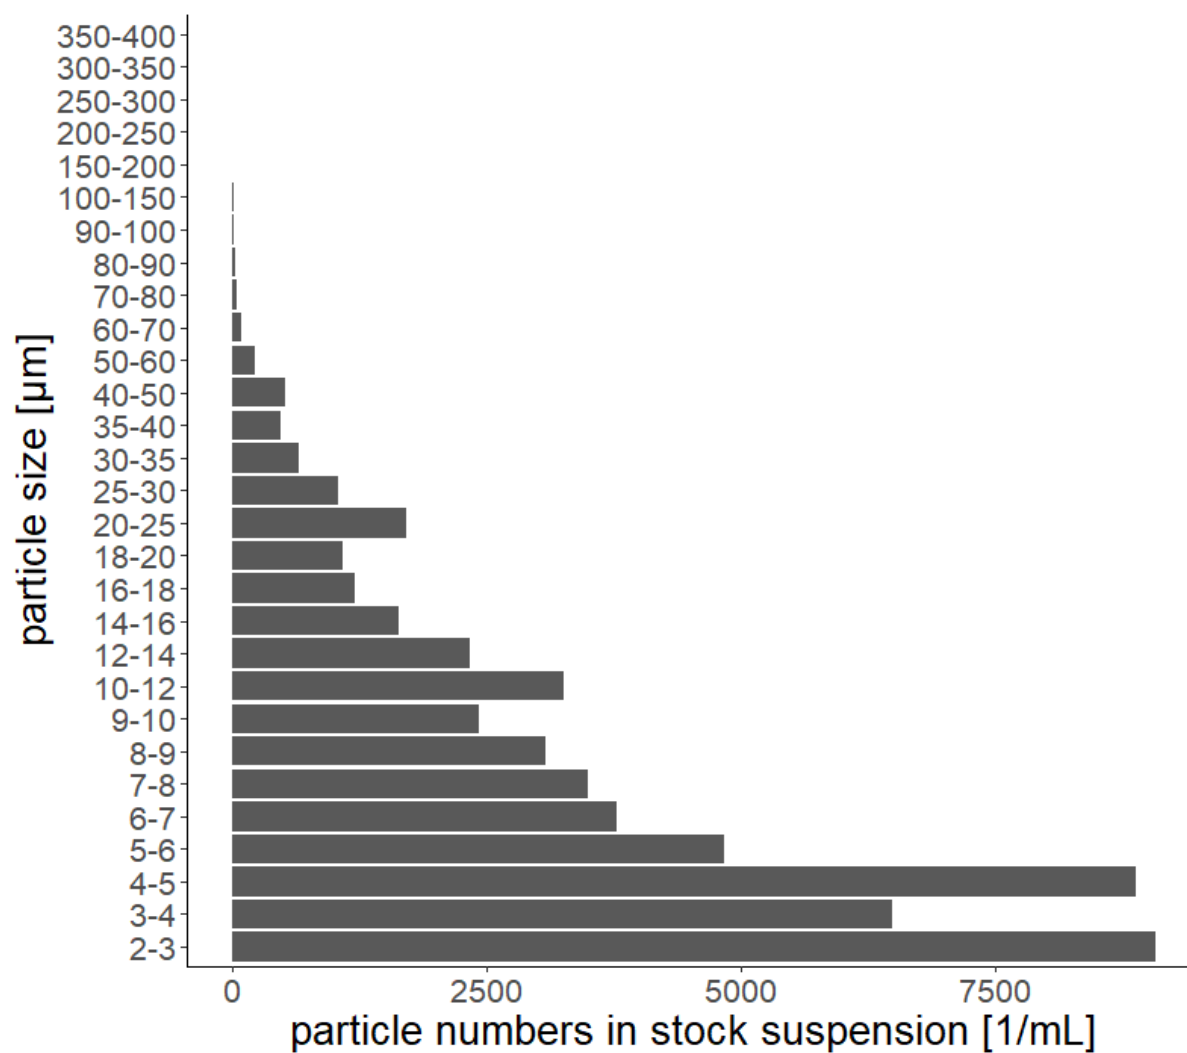

**Figure S1.** Size ranges and counted particle numbers of polystyrene particles in an exemplarily measured stock suspension.

**Table S2.** Water parameters first experiment (n.a.: not analyzed).

| Block | Start of experiment                        |      |                     |                         |                       |                          |                   |
|-------|--------------------------------------------|------|---------------------|-------------------------|-----------------------|--------------------------|-------------------|
|       | Treatment<br>(amitriptyline concentration) | pH   | Temperature<br>(°C) | Conductivity<br>(µS/cm) | O <sub>2</sub><br>(%) | O <sub>2</sub><br>(mg/L) | Nitrite<br>(mg/L) |
| 1     | control                                    | 7.53 | 6.8                 | 479                     | 11.13                 | 95.8                     | n.a.              |
| 1     | 1 µg/L                                     | 7.44 | 6.5                 | 484                     | 11.26                 | 96.1                     | n.a.              |
| 1     | 10 µg/L                                    | 7.52 | 7                   | 482                     | 11.13                 | 96.2                     | n.a.              |
| 1     | 100 µg/L                                   | 7.69 | 7                   | 487                     | 11.06                 | 95.6                     | n.a.              |
| 1     | 300 µg/L                                   | 7.69 | 6.4                 | 485                     | 11.28                 | 96                       | n.a.              |
| 1     | 1000 µg/L                                  | 7.82 | 7.1                 | 483                     | 10.86                 | 94.2                     | n.a.              |
| 2     | control                                    | 7.45 | 6.5                 | 480                     | 11.11                 | 94.8                     | n.a.              |
| 2     | 1 µg/L                                     | 7.47 | 6.1                 | 484                     | 11.39                 | 96.3                     | n.a.              |
| 2     | 10 µg/L                                    | 7.57 | 6.4                 | 480                     | 11.1                  | 94.6                     | n.a.              |
| 2     | 100 µg/L                                   | 7.67 | 6.8                 | 488                     | 11.06                 | 95.2                     | n.a.              |
| 2     | 300 µg/L                                   | 7.73 | 6.2                 | 484                     | 11.31                 | 96                       | n.a.              |
| 2     | 1000 µg/L                                  | 7.81 | 6.5                 | 483                     | 11.12                 | 94.9                     | n.a.              |

| 3                        | control                                            | 7.42      | 6.5                         | 481                             | 11.33                        | 96.7                            | n.a.                      |
|--------------------------|----------------------------------------------------|-----------|-----------------------------|---------------------------------|------------------------------|---------------------------------|---------------------------|
| 3                        | 1 µg/L                                             | 7.48      | 6.9                         | 486                             | 11.18                        | 96.5                            | n.a.                      |
| 3                        | 10 µg/L                                            | 7.62      | 6.4                         | 480                             | 11.29                        | 96.2                            | n.a.                      |
| 3                        | 100 µg/L                                           | 7.64      | 6.5                         | 484                             | 11.34                        | 96.8                            | n.a.                      |
| 3                        | 300 µg/L                                           | 7.74      | 6.7                         | 484                             | 11.26                        | 96.6                            | n.a.                      |
| 3                        | 1000 µg/L                                          | 7.79      | 6.4                         | 482                             | 11.16                        | 95                              | n.a.                      |
| <b>End of experiment</b> |                                                    |           |                             |                                 |                              |                                 |                           |
| <b>Block</b>             | <b>Treatment<br/>(amitriptyline concentration)</b> | <b>pH</b> | <b>Temperature<br/>(°C)</b> | <b>Conductivity<br/>(µS/cm)</b> | <b>O<sub>2</sub><br/>(%)</b> | <b>O<sub>2</sub><br/>(mg/L)</b> | <b>Nitrite<br/>(mg/L)</b> |
| 1                        | control                                            | 7.21      | 6.9                         | 482                             | 11.18                        | 96.5                            | 0.1                       |
| 1                        | 1 µg/L                                             | 7.23      | 6.8                         | 481                             | 11.21                        | 96.5                            | 0.1                       |
| 1                        | 10 µg/L                                            | 7.31      | 6.7                         | 477                             | 11.26                        | 96.7                            | 0.1                       |
| 1                        | 100 µg/L                                           | 7.31      | 6.8                         | 479                             | 11.23                        | 96.6                            | 0.1                       |
| 1                        | 300 µg/L                                           | n.a.      | n.a.                        | n.a.                            | n.a.                         | n.a.                            | n.a.                      |
| 1                        | 1000 µg/L                                          | n.a.      | n.a.                        | n.a.                            | n.a.                         | n.a.                            | n.a.                      |
| 2                        | control                                            | 7.24      | 6.8                         | 482                             | 11.03                        | 95.5                            | 0.1                       |
| 2                        | 1 µg/L                                             | 7.23      | 6.4                         | 480                             | 11.36                        | 96.7                            | 0.1                       |
| 2                        | 10 µg/L                                            | 7.29      | 6.3                         | 477                             | 11.38                        | 96.7                            | 0.1                       |
| 2                        | 100 µg/L                                           | 7.33      | 6.6                         | 479                             | 11.31                        | 96.8                            | 0.1                       |
| 2                        | 300 µg/L                                           | n.a.      | n.a.                        | n.a.                            | n.a.                         | n.a.                            | n.a.                      |
| 2                        | 1000 µg/L                                          | n.a.      | n.a.                        | n.a.                            | n.a.                         | n.a.                            | n.a.                      |
| 3                        | control                                            | 7.28      | 6.8                         | 480                             | 11.13                        | 95.9                            | 0.1                       |
| 3                        | 1 µg/L                                             | 7.25      | 6.4                         | 479                             | 11.31                        | 96.5                            | 0.1                       |
| 3                        | 10 µg/L                                            | 7.27      | 6.3                         | 475                             | 11.34                        | 96.5                            | 0.1                       |
| 3                        | 100 µg/L                                           | 7.35      | 6.5                         | 477                             | 11.29                        | 96.3                            | 0.1                       |
| 3                        | 300 µg/L                                           | n.a.      | n.a.                        | n.a.                            | n.a.                         | n.a.                            | n.a.                      |
| 3                        | 1000 µg/L                                          | n.a.      | n.a.                        | n.a.                            | n.a.                         | n.a.                            | n.a.                      |

**Table S3.** Water parameters second experiment (n.a.: not analyzed).

| Start of experiment |                   |      |                  |                      |                    |                       |                |                |
|---------------------|-------------------|------|------------------|----------------------|--------------------|-----------------------|----------------|----------------|
| Block               | Treatment         | pH   | Temperature (°C) | Conductivity (µS/cm) | O <sub>2</sub> (%) | O <sub>2</sub> (mg/L) | Nitrite (mg/L) | Total hardness |
| 1                   | control           | 7.98 | 7.0              | 476                  | 10.92              | 94.2                  | n.a.           | n.a.           |
| 1                   | MP <sub>tt</sub>  | 7.83 | 6.7              | 477                  | 10.91              | 93.4                  | n.a.           | n.a.           |
| 1                   | MP <sub>ht</sub>  | 7.77 | 6.6              | 476                  | 10.98              | 93.8                  | n.a.           | n.a.           |
| 1                   | amitriptyline     | 7.66 | 6.8              | 474                  | 11.05              | 94.7                  | n.a.           | n.a.           |
| 1                   | MIX <sub>tt</sub> | 7.66 | 6.6              | 475                  | 11.15              | 95.3                  | n.a.           | n.a.           |
| 1                   | MIX <sub>ht</sub> | 7.65 | 6.5              | 475                  | 11.02              | 94                    | n.a.           | n.a.           |
| 2                   | control           | 7.90 | 6.6              | 474                  | 10.83              | 92.6                  | n.a.           | n.a.           |
| 2                   | MP <sub>tt</sub>  | 7.82 | 6.5              | 476                  | 10.98              | 93.5                  | n.a.           | n.a.           |
| 2                   | MP <sub>ht</sub>  | 7.74 | 6.5              | 477                  | 10.69              | 91.2                  | n.a.           | n.a.           |
| 2                   | amitriptyline     | 7.66 | 6.6              | 475                  | 10.91              | 92.9                  | n.a.           | n.a.           |
| 2                   | MIX <sub>tt</sub> | 7.66 | 6.4              | 476                  | 11.02              | 93.7                  | n.a.           | n.a.           |
| 2                   | MIX <sub>ht</sub> | 7.66 | 6.3              | 474                  | 11.03              | 93.5                  | n.a.           | n.a.           |
| 3                   | control           | 7.84 | 6.6              | 477                  | 10.81              | 92.3                  | n.a.           | n.a.           |
| 3                   | MP <sub>tt</sub>  | 7.78 | 6.6              | 478                  | 10.62              | 90.8                  | n.a.           | n.a.           |
| 3                   | MP <sub>ht</sub>  | 7.73 | 6.5              | 477                  | 10.52              | 89.7                  | n.a.           | n.a.           |
| 3                   | amitriptyline     | 7.66 | 6.4              | 474                  | 10.96              | 93.2                  | n.a.           | n.a.           |
| 3                   | MIX <sub>tt</sub> | 7.66 | 6.5              | 477                  | 10.86              | 92.5                  | n.a.           | n.a.           |
| 3                   | MIX <sub>ht</sub> | 7.65 | 6.3              | 476                  | 10.7               | 90.7                  | n.a.           | n.a.           |
| End of experiment   |                   |      |                  |                      |                    |                       |                |                |
| Block               | Treatment         | pH   | Temperature (°C) | Conductivity (µS/cm) | O <sub>2</sub> (%) | O <sub>2</sub> (mg/L) | Nitrite (mg/L) | Total hardness |
| 1                   | control           | 7.62 | 6.6              | 486                  | 11.41              | 97.1                  | 0,05 - 0,1     | 16             |
| 1                   | MP <sub>tt</sub>  | 7.41 | 6.3              | 487                  | 11.5               | 97.4                  | 0,05 - 0,1     | 14             |
| 1                   | MP <sub>ht</sub>  | 7.42 | 6.3              | 486                  | 11.49              | 97.3                  | 0,05 - 0,1     | 15             |
| 1                   | amitriptyline     | 7.48 | 6.2              | 486                  | 11.47              | 96.8                  | 0.1            | 15             |
| 1                   | MIX <sub>tt</sub> | 7.53 | 6.1              | 486                  | 11.49              | 96.8                  | 0,05 - 0,1     | 15             |
| 1                   | MIX <sub>ht</sub> | 7.56 | 6.3              | 485                  | 11.46              | 96.9                  | 0,05 - 0,1     | 15             |
| 2                   | control           | 7.57 | 6.3              | 486                  | 11.35              | 96                    | 0,05 - 0,1     | 16             |
| 2                   | MP <sub>tt</sub>  | 7.41 | 6.2              | 483                  | 11.49              | 96.9                  | 0.1            | 15             |
| 2                   | MP <sub>ht</sub>  | 7.45 | 6.3              | 485                  | 11.42              | 96.6                  | 0.1            | 15             |
| 2                   | amitriptyline     | 7.5  | 6.2              | 484                  | 11.48              | 96.9                  | 0.1            | 15             |
| 2                   | MIX <sub>tt</sub> | 7.54 | 6.1              | 482                  | 11.42              | 96.2                  | 0.1            | 15             |
| 2                   | MIX <sub>ht</sub> | 7.58 | 6                | 480                  | 11.41              | 95.9                  | 0.1            | 14             |
| 3                   | control           | 7.57 | 6.2              | 483                  | 11.47              | 96.8                  | 0.1            | 15             |
| 3                   | MP <sub>tt</sub>  | 7.51 | 6.3              | 486                  | 11.48              | 97.2                  | 0.1            | 16             |
| 3                   | MP <sub>ht</sub>  | 7.46 | 6.2              | 482                  | 11.43              | 96.5                  | 0.1            | 15             |
| 3                   | amitriptyline     | 7.51 | 6.1              | 484                  | 11.39              | 95.9                  | 0.1            | 15             |
| 3                   | MIX <sub>tt</sub> | 7.55 | 6.2              | 488                  | 11.36              | 96                    | 0,05 - 0,1     | 15             |
| 3                   | MIX <sub>ht</sub> | 7.58 | 6                | 485                  | 11.52              | 96.8                  | 0,05 - 0,1     | 15             |

**Table S4.** Operating parameters of the triple quadrupole MS (Agilent 6490 QqQ) in positive mode (ESI +).

| Instrument Parameters       |      |
|-----------------------------|------|
| Gas Temp (°C)               | 150  |
| Gas Flow (L/min)            | 16   |
| Nebulizer (psig)            | 40   |
| Sheath gas temperature (°C) | 300  |
| Sheath gas flow             | 12   |
| Source Parameters           |      |
| Capillary voltage (V)       | 4200 |
| Nozzle voltage (V)          | 1000 |

**Table S5.** Specific measurement parameters for amitriptyline with LC-QqQ in water samples. Intraday variation (RSD) is calculated with a 1 µg/L standard (10 µl injection volume and 4 replicates); FV: fragmentor voltage; RT: retention time; LOQ: Limit of quantification.

| Precursor Ion | Product Ion 1 (CE in eV) | Product Ion 2 (CE in eV) | FV (V) | RT (min) | RSD (%)<br>n = 4 | LOQ (ng/L) |
|---------------|--------------------------|--------------------------|--------|----------|------------------|------------|
| 278.2         | 117 (21)                 | 91 (25)                  | 380    | 5.2      | 2                | 100        |

**Table S6.** Used data transformations.

| Experiment | Endpoint                         | Transformation                                   |
|------------|----------------------------------|--------------------------------------------------|
| 1          | AChE                             | log(x)                                           |
| 1          | CbE-NPA                          | sqrt (x)                                         |
| 1          | CbE-NPV                          | sqrt (x)                                         |
| 1          | SOD                              | sqrt (x)                                         |
| 1          | Mean velocity                    | log(x) (variance of data part of effect)         |
| 1          | Mean velocity (end of recording) | log (x)                                          |
| 1          | Time of no movement              | x <sup>3</sup> (variance of data part of effect) |
| 1          | Total distance covered           | log(x)                                           |
| 2          | weight                           | log (x)                                          |
| 2          | length                           | x <sup>2</sup>                                   |
| 2          | AChE                             | log(x)                                           |
| 2          | CbE-NPA                          | 1/x                                              |
| 2          | CbE-NPV                          | 1/sqrt(x)                                        |
| 2          | SOD                              | sqrt (x)                                         |
| 2          | Cortisol                         | sqrt (x)                                         |
| 2          | Mean velocity                    | sqrt (x) (variance of data part of effect)       |
| 2          | Time of no movement              | x <sup>3</sup> (variance of data part of effect) |
| 2          | Total distance covered           | sqrt(x)                                          |

**Table S7.** Further statistical information on the second experiment. Significant differences are indicated with an asterisk and highlighted in bold. Trends are highlighted italic.

|                                   | <b>Group 1</b>         | <b>Group 2</b>          | <b><i>p</i> value</b> |
|-----------------------------------|------------------------|-------------------------|-----------------------|
| Fish in upper part<br>of the tank | <b>Control</b>         | <b>Amitriptyline</b>    | <b>0.009*</b>         |
|                                   | Control                | MP <sub>tt</sub>        | 1.000                 |
|                                   | Control                | MP <sub>ht</sub>        | 1.000                 |
|                                   | <b>Control</b>         | <b>MIX<sub>tt</sub></b> | <b>0.006*</b>         |
|                                   | Control                | MIX <sub>ht</sub>       | 0.862                 |
|                                   | Amitriptyline          | MIX <sub>tt</sub>       | 1.000                 |
|                                   | Amitriptyline          | MIX <sub>ht</sub>       | 0.190                 |
|                                   | MP <sub>tt</sub>       | MP <sub>ht</sub>        | 1.000                 |
|                                   | <b>MP<sub>tt</sub></b> | <b>MIX<sub>tt</sub></b> | <b>0.006*</b>         |
|                                   | MP <sub>ht</sub>       | MIX <sub>ht</sub>       | 0.862                 |
|                                   | <b>Group 1</b>         | <b>Group 2</b>          | <b><i>p</i> value</b> |
| Mean velocity                     | <b>Control</b>         | <b>Amitriptyline</b>    | <b>0.035*</b>         |
|                                   | Control                | MP <sub>tt</sub>        | 0.993                 |
|                                   | Control                | MP <sub>ht</sub>        | 0.958                 |
|                                   | <b>Control</b>         | <b>MIX<sub>tt</sub></b> | <b>0.014*</b>         |
|                                   | <b>Control</b>         | <b>MIX<sub>ht</sub></b> | <b>&lt;0.001*</b>     |
|                                   | Amitriptyline          | MIX <sub>tt</sub>       | 1.000                 |
|                                   | Amitriptyline          | MIX <sub>ht</sub>       | 0.691                 |
|                                   | MP <sub>tt</sub>       | MP <sub>ht</sub>        | 1.000                 |
|                                   | <i>MP<sub>tt</sub></i> | <i>MIX<sub>tt</sub></i> | <i>0.0677 TREND</i>   |
|                                   | <b>MP<sub>ht</sub></b> | <b>MIX<sub>ht</sub></b> | <b>0.005*</b>         |
|                                   | <b>Group 1</b>         | <b>Group 2</b>          | <b><i>p</i> value</b> |
| Time of no<br>movement            | <b>Control</b>         | <b>Amitriptyline</b>    | <b>0.011*</b>         |
|                                   | Control                | MP <sub>tt</sub>        | 0.992                 |
|                                   | Control                | MP <sub>ht</sub>        | 0.943                 |
|                                   | <b>Control</b>         | <b>MIX<sub>tt</sub></b> | <b>0.012*</b>         |
|                                   | <b>Control</b>         | <b>MIX<sub>ht</sub></b> | <b>&lt;0.001*</b>     |
|                                   | Amitriptyline          | MIX <sub>tt</sub>       | 1.000                 |
|                                   | Amitriptyline          | MIX <sub>ht</sub>       | 0.940                 |
|                                   | MP <sub>tt</sub>       | MP <sub>ht</sub>        | 0.999                 |
|                                   | <i>MP<sub>tt</sub></i> | <i>MIX<sub>tt</sub></i> | <i>0.066 TREND</i>    |
|                                   | <b>MP<sub>ht</sub></b> | <b>MIX<sub>ht</sub></b> | <b>0.012*</b>         |
|                                   | <b>Group 1</b>         | <b>Group 2</b>          | <b><i>p</i> value</b> |
| Total distance<br>moved           | <b>Control</b>         | <b>Amitriptyline</b>    | <b>0.034*</b>         |
|                                   | Control                | MP <sub>tt</sub>        | 1.000                 |
|                                   | Control                | MP <sub>ht</sub>        | 1.000                 |
|                                   | <b>Control</b>         | <b>MIX<sub>tt</sub></b> | <b>0.014*</b>         |
|                                   | <b>Control</b>         | <b>MIX<sub>ht</sub></b> | <b>&lt;0.001*</b>     |
|                                   | Amitriptyline          | MIX <sub>tt</sub>       | 1.000                 |
|                                   | Amitriptyline          | MIX <sub>ht</sub>       | 0.679                 |
|                                   | MP <sub>tt</sub>       | MP <sub>ht</sub>        | 0.998                 |
|                                   | <b>MP<sub>tt</sub></b> | <b>MIX<sub>tt</sub></b> | <b>0.009*</b>         |
|                                   | <b>MP<sub>ht</sub></b> | <b>MIX<sub>ht</sub></b> | <b>&lt;0.001*</b>     |

**Table S8.** Results of the treatment groups with 300 µg/L and 1000 µg/L amitriptyline which were terminated after 7d and 1 d, respectively.

|                                             | 300 µg/L<br>amitriptyline | 1000 µg/L<br>amitriptyline |
|---------------------------------------------|---------------------------|----------------------------|
| <b>Mortality (%)</b>                        | n.a.                      | n.a.                       |
| <b>Length (cm)</b>                          | 6.0<br>± 0.7              | 6.3<br>± 0.7               |
| <b>Body mass (g)</b>                        | 1.98<br>± 0.73            | 2.36<br>± 0.83             |
| <b>Fish in upper half of the tank (%)</b>   | n.a.                      | n.a.                       |
| <b>Total distance moved (cm)</b>            | n.a.                      | n.a.                       |
| <b>Mean velocity (cm/s)</b>                 | n.a.                      | n.a.                       |
| <b>No movement (s)</b>                      | n.a.                      | n.a.                       |
| <b>Lipid peroxidation<br/>(CHP-equiv.)</b>  | 28.26<br>± 11.62          | 26.74<br>± 13.10           |
| <b>SOD<br/>(U/mL)</b>                       | 84.01<br>± 29.36          | 86.56<br>± 36.73           |
| <b>Cortisol level<br/>(ng/mL)</b>           | 40.35<br>± 50.72          | 46.91<br>± 54.50           |
| <b>AChE activity<br/>(µu/mg protein)</b>    | 122.60<br>± 29.92         | 110.22<br>± 24.17          |
| <b>CbE-NPA activity<br/>(µu/mg protein)</b> | 103.44<br>± 23.03         | 92.31<br>± 19.85           |
| <b>CbE-NPV activity<br/>(µu/mg protein)</b> | 65.45<br>± 26.24          | 58.26<br>± 22.50           |

## CRED Reporting

| 1. General information              |                                                                                                                                                                                                                                                                                                                   |
|-------------------------------------|-------------------------------------------------------------------------------------------------------------------------------------------------------------------------------------------------------------------------------------------------------------------------------------------------------------------|
| a) Purpose of study                 | Evaluation of effects of polystyrene microplastic particles, the antidepressant amitriptyline, and the mixture of both on health and behavior of juvenile brown trout                                                                                                                                             |
| b) Description of endpoints         | Mortality, biometric values, behavior during the experiment, behavior in a stressful environment, level of lipid peroxides (FOX), SOD activity, AChE activity, CbE activity, tissue cortisol concentration                                                                                                        |
| 2. Test design                      |                                                                                                                                                                                                                                                                                                                   |
| a) standard/modified standard       | Not performed according to standard procedures                                                                                                                                                                                                                                                                    |
| b) Good Laboratory Practices (GLP)  | Not GLP-accredited                                                                                                                                                                                                                                                                                                |
| c) Controls                         | Negative control (Per experiment 30 fish separated in 3 replicate tanks)                                                                                                                                                                                                                                          |
| d) Validity                         | First experiment: Control mortality < 20%, oxygen concentration was over 60%, and the temperature difference between the aquaria was smaller than 1.5 °C<br>Second experiment: Control mortality 0%, oxygen concentration was over 60% and the temperature difference between the aquaria was smaller than 1.5 °C |
| 3.1. Test compound – amitriptyline  |                                                                                                                                                                                                                                                                                                                   |
| a) Identification                   | Amitriptyline hydrochloride (CAS number: 549-18-8; Molecular Formula: C <sub>20</sub> H <sub>23</sub> N · HCl; molecular weight 313.86)                                                                                                                                                                           |
| b) Physico-chemical characteristics | Octanol/water partition coefficient: log Pow 5.0; melting point; 198 -200 °C                                                                                                                                                                                                                                      |
| c) Source                           | Sigma-Aldrich, Lot: BCBV1175                                                                                                                                                                                                                                                                                      |
| d) Purity in %                      | ≥98 %;                                                                                                                                                                                                                                                                                                            |
| e) Formulation                      | No formulation, no impurities                                                                                                                                                                                                                                                                                     |
| 3.2. Test compound – polystyrene    |                                                                                                                                                                                                                                                                                                                   |
| a) Identification                   | Polystyrene pellets (Polystyrol 158 K)                                                                                                                                                                                                                                                                            |
| b) Physico-chemical characteristics | Transparent, density: 1.05 g/mL                                                                                                                                                                                                                                                                                   |
| c) Source                           | BASF, Germany                                                                                                                                                                                                                                                                                                     |
| 4. Test organism                    |                                                                                                                                                                                                                                                                                                                   |
| a) Scientific name                  | <i>Salmo trutta f. fario</i>                                                                                                                                                                                                                                                                                      |
| b) Body weight/length               | First experiment: 2.2 ± 0.67 g / 6.1 ± 0.59 cm<br>Second experiment: 3.1 ± 0.86 g / 7.0 ± 0.68 cm                                                                                                                                                                                                                 |
| c) Age/life stage                   | Juvenile                                                                                                                                                                                                                                                                                                          |
| d) Reproductive condition           | Not in reproductive condition                                                                                                                                                                                                                                                                                     |
| e) Sex                              | Not determinable                                                                                                                                                                                                                                                                                                  |
| f) Strain/clone                     | No defined clone                                                                                                                                                                                                                                                                                                  |
| g) Source                           | Commercial trout farm (Forellenzucht Lohmühle, Alprsbach-Ehlenbogen, Germany)                                                                                                                                                                                                                                     |
| h) Acclimatization                  | First experiment: 1 week<br>Second experiment: 9 weeks                                                                                                                                                                                                                                                            |
| 5. Exposure conditions              |                                                                                                                                                                                                                                                                                                                   |



|                            |                                                                                                                                                                                                                                                                                                                                                                           |
|----------------------------|---------------------------------------------------------------------------------------------------------------------------------------------------------------------------------------------------------------------------------------------------------------------------------------------------------------------------------------------------------------------------|
| a) Schedule                | Semi-static system; 50% water exchanges twice a week                                                                                                                                                                                                                                                                                                                      |
| b) System                  | Closed                                                                                                                                                                                                                                                                                                                                                                    |
| c) Test medium             | Filtered tap water (iron filter, active charcoal filter, particle filter) cooled and aerated                                                                                                                                                                                                                                                                              |
| d) Temperature             | Climate chamber set to 7 °C; first experiment: 6.60 ± 0.25 °C; second experiment: 6.39 ± 0.23 °C                                                                                                                                                                                                                                                                          |
| e) pH                      | First experiment: average pH 7.5 ± 0.2<br>Second experiment: average pH 7.6 ± 0.1                                                                                                                                                                                                                                                                                         |
| f) Hardness                | First experiment: not measured<br>Second experiment: total hardness 15 ± 0.5                                                                                                                                                                                                                                                                                              |
| g) Conductivity            | First experiment: average conductivity 481.5 ± 3.1 µS/cm<br>Second experiment: average conductivity 480.2 ± 4.7 µS/cm                                                                                                                                                                                                                                                     |
| h) Dissolved oxygen        | First experiment: 11.21 ± 0.12 mg/L, 96.02 ± 0.72%<br>Second experiment: 11.17 ± 0.30 mg/L, 94.78 ± 2.17%                                                                                                                                                                                                                                                                 |
| i) Light intensity/quality | 10 h/14 h light/dark cycle; tanks were shaded from direct light with black plastic foil                                                                                                                                                                                                                                                                                   |
| j) Feeding                 | Daily 3% of body weight of commercially available trout feed (0.8 mm, Incio Plus, Biomar, Brande, Denmark)                                                                                                                                                                                                                                                                |
| k) Aquaria                 | 20 L glass aquaria filled with 15 L of medium, covered with glass plane, silicone tubing and glass pipette for aeration                                                                                                                                                                                                                                                   |
| l) Sand/sediment           | No sediment tested                                                                                                                                                                                                                                                                                                                                                        |
| m) Stock solutions         | For the first experiment two stock solutions were prepared with bi-distilled water: stock solution I contained 100 mg/L amitriptyline. For stock solution II, with a concentration of 1 mg/L, 10 mL of stock solution I were diluted with 990 mL bi-distilled water. For the second a stock solution with a concentration of 25 mg/L amitriptyline was prepared.          |
| n) Nominal concentrations  | For polystyrene: 56,240 particles/mL<br>First experiment: 0, 1, 10, 100, 300, 1000 µg/L amitriptyline<br>Second experiment: negative control, 100 µL/L amitriptyline, 10 <sup>4</sup> particles/L PS MP, 10 <sup>5</sup> particles/L PS MP and the mixtures 100 µg/L amitriptyline + 10 <sup>4</sup> particles/L and 100 µg/L amitriptyline + 10 <sup>5</sup> particles/L |
| o) Measured concentrations | See Table 1 and Table 2                                                                                                                                                                                                                                                                                                                                                   |
| p) Method                  | Liquid chromatography–mass spectrometry (LC-MS)                                                                                                                                                                                                                                                                                                                           |
| q) Duration                | First experiment: 21/22 days (31.07.2018 - 21.8.2018/22.8.2018)<br>Second experiment: 21/22 days (27.09.2018- 18/19.10.2018).                                                                                                                                                                                                                                             |

|                    |                                                                                             |
|--------------------|---------------------------------------------------------------------------------------------|
| r) Observations    | See material and methods                                                                    |
| s) Results         | See Table 3, Table 4 in the manuscript                                                      |
| t) Biomass loading | At the end of the experiments:<br>First experiment: 1.47 g/L<br>Second experiment: 2.07 g/L |

---

## 6. Statistical Design and Biological Response

---

|                        |                                                                                                                                                                                                                                                                                                                                                                                                                                                                                                                                                                                                                                                                                                                                                                                                                                                                                                                                                                                                                                                                                                                                                                                                                                                                                                                                                                                                                         |
|------------------------|-------------------------------------------------------------------------------------------------------------------------------------------------------------------------------------------------------------------------------------------------------------------------------------------------------------------------------------------------------------------------------------------------------------------------------------------------------------------------------------------------------------------------------------------------------------------------------------------------------------------------------------------------------------------------------------------------------------------------------------------------------------------------------------------------------------------------------------------------------------------------------------------------------------------------------------------------------------------------------------------------------------------------------------------------------------------------------------------------------------------------------------------------------------------------------------------------------------------------------------------------------------------------------------------------------------------------------------------------------------------------------------------------------------------------|
| a) Replicates          | Three replicate aquaria per test concentration                                                                                                                                                                                                                                                                                                                                                                                                                                                                                                                                                                                                                                                                                                                                                                                                                                                                                                                                                                                                                                                                                                                                                                                                                                                                                                                                                                          |
| b) Number of organisms | 10 individual fish per replicate                                                                                                                                                                                                                                                                                                                                                                                                                                                                                                                                                                                                                                                                                                                                                                                                                                                                                                                                                                                                                                                                                                                                                                                                                                                                                                                                                                                        |
| c) Design              | Three blocks, one replicate per treatment<br>present in each block, placed randomized within<br>each block                                                                                                                                                                                                                                                                                                                                                                                                                                                                                                                                                                                                                                                                                                                                                                                                                                                                                                                                                                                                                                                                                                                                                                                                                                                                                                              |
| d) Statistical methods | Mortality: mixed effects Cox model (package<br>coxme, treatment as fixed effect and aquarium<br>ID as random effect; length, weight (second<br>experiment), AChE, CbE-pnpa, CbE-pnpv, SOD,<br>total distance moved, velocity at the last minute<br>of recording (first experiment): linear mixed<br>model (package lme4, treatment as fixed and<br>aquarium ID as random effect); cortisol level<br>(second experiment): linear mixed model<br>(package lme4, treatment and “inclusion in<br>video tracking” as fixed and aquarium ID as<br>random effect); mean velocity and time of no<br>movement: linear mixed model (package lme4,<br>treatment and recording time as fixed and<br>aquarium ID as random effect); Weight (first<br>experiment): Welch-ANOVA; Cortisol (first<br>experiment), time of no movement at last<br>minute of recording (first experiment) and LPO:<br>Kruskal Wallis test; position of the fish in the<br>tank during the experiments: generalized linear<br>mixed models (treatment group and days of<br>exposure as fixed factors and aquarium ID as<br>random factor; second experiment package<br>glmmTMB). In the first experiment Dunnett’s<br>Test or Conover’s many-to one test was used as<br>a post hoc test in the second experiment Tukey’s<br>all-pair comparisons. If necessary multiple<br>comparisons were corrected with the method of<br>Benjamini and Hochberg (1995). |
| e) Biological response | No effect on mortality, length, weight, SOD<br>activity, LPO level, activity of CbEs and cortisol<br>level in both experiments. No effect in first<br>experiment on mean velocity (trend: decreased<br>in 10 and 100 µg/L), time of no movement<br>(trend: increased in 10 and 100 µg/L), No effect<br>on AChE in the second experiment.<br>First experiment: Ataxic movements (300 µg/L<br>and 1000 µg/L amitriptyline); More fish in upper<br>half of the tank (100 µg/L amitriptyline); Total<br>distance move decreased (10 µg/L<br>amitriptyline); Reduced velocity and increased                                                                                                                                                                                                                                                                                                                                                                                                                                                                                                                                                                                                                                                                                                                                                                                                                                  |

|                              |                                                                                                                                                                                                                                                                                                                                                                                                                                                                                                                                                                                                                                                                                                                                                                                                                                                                                                                                                                                                                                                                        |
|------------------------------|------------------------------------------------------------------------------------------------------------------------------------------------------------------------------------------------------------------------------------------------------------------------------------------------------------------------------------------------------------------------------------------------------------------------------------------------------------------------------------------------------------------------------------------------------------------------------------------------------------------------------------------------------------------------------------------------------------------------------------------------------------------------------------------------------------------------------------------------------------------------------------------------------------------------------------------------------------------------------------------------------------------------------------------------------------------------|
|                              | <p>time of no movement at last minute of recording (10 and 100 µg/L amitriptyline); Increased AChE activity (100 µg/L amitriptyline)</p> <p>Second experiment: More fish in upper half of the tanks (amitriptyline and MIX<sub>tt</sub>); Reduced mean velocity and distance moved (amitriptyline and MIX<sub>tt</sub>, MIX<sub>ht</sub>); increased time of no movement (amitriptyline and MIX<sub>tt</sub>, MIX<sub>ht</sub>).</p>                                                                                                                                                                                                                                                                                                                                                                                                                                                                                                                                                                                                                                   |
| f) Dose-response             | <p>First experiment: ataxic movements in fish exposed to highest tested concentrations (300 and 1000 µg/L amitriptyline). More fish in upper half of the tank during the experiment and increased AChE activity in the highest, for the whole experiment tested concentration (100 µg/L amitriptyline). Decreased velocity and increased inactivity at end of video tracking of two highest tested amitriptyline concentrations (10 and 100 µg/L amitriptyline). No dose response was observed for total distance moved as only a significant decrease occurred in fish exposed to 10 but not to 100 µg/L amitriptyline.</p> <p>Second experiment: not tested</p>                                                                                                                                                                                                                                                                                                                                                                                                      |
| g) Statistical significances | <p>First experiment: More fish in upper half of tank (control – 100 µg/L amitriptyline), decreased total distance moved (control - 10 µg/L amitriptyline), reduced velocity and increased time of no movement at last minute of recording (control -10 µg/L amitriptyline and control-100 µg/L amitriptyline) and increased AChE activity (control - 100 µg/L amitriptyline).</p> <p>Second experiment: More fish in upper half of the tank during the experiment (control – amitriptyline and MIX<sub>tt</sub>; MP<sub>tt</sub>-MIX<sub>tt</sub>), decreased distance moved (control - amitriptyline, MIX<sub>tt</sub> and MIX<sub>ht</sub>; MP<sub>tt</sub>-MIX<sub>tt</sub>; MP<sub>ht</sub> – MIX<sub>ht</sub>), mean velocity (control - amitriptyline, MIX<sub>tt</sub> and MIX<sub>ht</sub>; MP<sub>ht</sub> – MIX<sub>ht</sub>; Trend: MP<sub>tt</sub>-MIX<sub>tt</sub>), and increased time of no movement (control - amitriptyline, MIX<sub>tt</sub> and MIX<sub>ht</sub>; MP<sub>ht</sub> – MIX<sub>ht</sub>; Trend: MP<sub>tt</sub>-MIX<sub>tt</sub>).</p> |
| h) Significance level        | <p><math>\alpha = 0.05</math>, in case of multiple comparisons adjusted via the method of Benjamini and Hochberg</p>                                                                                                                                                                                                                                                                                                                                                                                                                                                                                                                                                                                                                                                                                                                                                                                                                                                                                                                                                   |
| i) Variability               | <p>Not estimated</p>                                                                                                                                                                                                                                                                                                                                                                                                                                                                                                                                                                                                                                                                                                                                                                                                                                                                                                                                                                                                                                                   |
| j) Raw data                  | <p>Provided in supplementary material</p>                                                                                                                                                                                                                                                                                                                                                                                                                                                                                                                                                                                                                                                                                                                                                                                                                                                                                                                                                                                                                              |
